# Supplementary material for: Genotype-driven identification of a molecular network predictive of advanced coronary calcium in ClinSeq® and Framingham Heart Study cohorts
Source: PubMed Central journal article supplement (PMC5659034; doi:10.1186/s12918-017-0474-5), 2017-10-26
Supplement: 12918_2017_474_MOESM1_ESM.pdf [file 12918_2017_474_MOESM1_ESM.pdf]

Table S1: **Clinical variables**

| Number | Variable                      | Description                                                                      |
|--------|-------------------------------|----------------------------------------------------------------------------------|
| 1      | Age                           | -                                                                                |
| 2      | Gender                        | -                                                                                |
| 3      | Systolic BP (mmHg)            | Maximum arterial pressure during contraction of the left ventricle of the heart. |
| 4      | Diastolic BP (mmHg)           | Minimum arterial pressure when the ventricles of the heart fill with blood.      |
| 5      | BMI (kg/m <sup>2</sup> )      | A person's weight in kilograms divided by the square of height in meters.        |
| 6      | Fasting Blood Glucose (mg/dL) | Level of glucose in the blood after an overnight fast.                           |
| 7      | Total Cholesterol (mg/dL)     | Calculated as LDL+HDL+Triglycerides/5, used to assess heart disease risk.        |
| 8      | Triglycerides (mg/dL)         | Lipids that are used to store energy and give energy to muscles.                 |
| 9      | HDL Cholesterol               | Moves excess cholesterol from the cells to the liver.                            |
| 10     | LDL Cholesterol               | Transports lipids around the body within the water outside cells.                |
| 11     | Fibrinogen                    | A coagulation factor that is essential for blood clot formation.                 |

Except age and gender, all clinical variables are used for predicting coronary calcium within random forest models in conjunction with SNP predictors.

Table S2: **General statistics of clinical variables among controls and case subjects (89<sup>th</sup>-99<sup>th</sup> CAC score percentile) in the ClinSeq® cohort**

| Number | Variable                      | p-value | Cases mean | Cases SD | Controls mean | Controls SD |
|--------|-------------------------------|---------|------------|----------|---------------|-------------|
| 1      | Age                           | 0.82    | 58.25      | 4.70     | 57.88         | 4.33        |
| 2      | Gender                        | -       | All males  | -        | All males     | -           |
| 3      | Systolic BP (mmHg)            | 0.51    | 129.91     | 10.45    | 126.97        | 14.18       |
| 4      | Diastolic BP (mmHg)           | 0.70    | 78.06      | 7.04     | 76.91         | 9.33        |
| 5      | BMI (kg/m <sup>2</sup> )      | 0.09    | 28.74      | 5.03     | 26.17         | 2.79        |
| 6      | Fasting Blood Glucose (mg/dL) | 0.07    | 106.44     | 16.74    | 97.69         | 8.34        |
| 7      | Total Cholesterol (mg/dL)     | 0.78    | 190.75     | 49.02    | 186.75        | 30.88       |
| 8      | Triglycerides (mg/dL)         | 0.17    | 127.13     | 62.69    | 98.75         | 49.77       |
| 9      | HDL Cholesterol (mg/dL)       | 0.11    | 49.38      | 11.59    | 56.00         | 11.44       |
| 10     | LDL Cholesterol (mg/dL)       | 0.74    | 115.63     | 38.28    | 111.44        | 30.88       |
| 11     | Fibrinogen (mg/dL)            | 0.37    | 312.38     | 33.28    | 299.63        | 45.61       |

Mean and standard deviation (SD) values of the clinical variables in the ClinSeq® cohort. Per variable, a p-value is computed using a two-sample t-test (with univariate criterion) by testing the null hypothesis that the case and control vectors are from populations with equal means without making the assumption that the two populations have equal variance values for any predictor.

Table S3: **General statistics of clinical variables among controls and case subjects (89<sup>th</sup>-99<sup>th</sup> CAC score percentile) in the FHS cohort**

| Number | Variable                      | p-value | Cases mean | Cases SD | Controls mean | Controls SD |
|--------|-------------------------------|---------|------------|----------|---------------|-------------|
| 1      | Age                           | 0.58    | 51.28      | 5.57     | 50.53         | 5.98        |
| 2      | Gender                        | -       | All males  | -        | All males     | -           |
| 3      | Systolic BP (mmHg)            | 0.10    | 125.86     | 17.07    | 120.00        | 12.03       |
| 4      | Diastolic BP (mmHg)           | 0.72    | 78.56      | 10.32    | 77.81         | 6.67        |
| 5      | BMI (kg/m <sup>2</sup> )      | 0.21    | 28.41      | 4.44     | 27.23         | 3.38        |
| 6      | Fasting Blood Glucose (mg/dL) | 0.07    | 102.25     | 10.78    | 98.06         | 8.39        |
| 7      | Total Cholesterol (mg/dL)     | 0.97    | 194.22     | 36.50    | 193.89        | 31.34       |
| 8      | Triglycerides (mg/dL)         | 0.65    | 130.33     | 72.43    | 122.89        | 64.47       |
| 9      | HDL Cholesterol (mg/dL)       | 0.86    | 46.78      | 13.05    | 46.25         | 12.76       |
| 10     | LDL Cholesterol (mg/dL)       | 0.81    | 121.38     | 32.00    | 123.06        | 28.43       |
| 11     | Fibrinogen (mg/dL)            | 0.09    | 361.86     | 97.01    | 329.33        | 58.59       |

Mean and standard deviation (SD) values of the clinical variables in the FHS cohort. Per variable, a p-value is computed using a two-sample t-test (with univariate criterion) by testing the null hypothesis that the case and control vectors are from populations with equal means without making the assumption that the two populations have equal variance values for any predictor.

Table S4: List of SNPs associated with CAC in past GWAS and meta-analyses (SNP Set 1)

| Number | SNP        | Locus             | p-value | GWAS | Number | SNP        | Locus               | p-value | GWAS |
|--------|------------|-------------------|---------|------|--------|------------|---------------------|---------|------|
| 1      | rs4456611  | <i>BCL2</i>       | 4.1E-4  | [1]  | 37     | rs34014631 | <i>C10orf76</i>     | 4.3E-6  | [2]  |
| 2      | rs3789422  | <i>ABCA4</i>      | 8.5E-5  | [1]  | 38     | rs11777747 | <i>FLJ43860</i>     | 7.9E-6  | [2]  |
| 3      | rs13386681 | <i>ATOX8</i>      | 1.6E-4  | [1]  | 39     | rs9506514  | <i>IFT88</i> *      | 4.9E-6  | [2]  |
| 4      | rs10499276 | <i>OPRM1</i> *    | 6.9E-5  | [1]  | 40     | rs7070038  | <i>IPMK</i> *       | 6.6E-6  | [2]  |
| 5      | rs13260    | <i>COL4A1</i>     | 8.7E-5  | [1]  | 41     | rs7765175  | <i>MARCKS</i> *     | 4.7E-6  | [2]  |
| 6      | rs6667260  | <i>ITPKB</i>      | 8.0E-5  | [1]  | 42     | rs10502575 | <i>MCART2</i> *     | 1.5E-7  | [2]  |
| 7      | rs3768991  | <i>NPAS2</i>      | 3.7E-4  | [1]  | 43     | rs10803016 | <i>PLD5</i>         | 7.4E-6  | [2]  |
| 8      | rs17056112 | <i>ADRA1A</i>     | 3.3E-4  | [1]  | 44     | rs16976171 | <i>RIT2</i> *       | 3.6E-6  | [2]  |
| 9      | rs4977574  | <i>CDKN2B-AS1</i> | 9.0E-5  | [1]  | 45     | rs7856675  | <i>SLC1A1</i>       | 8.3E-6  | [2]  |
| 10     | rs2891168  | <i>CDKN2B-AS1</i> | 1.7E-4  | [1]  | 46     | rs9907236  | <i>SOX9</i> *       | 1.7E-6  | [2]  |
| 11     | rs10757274 | <i>CDKN2B-AS1</i> | 2.2E-4  | [1]  | 47     | rs2622633  | <i>ZFPM2</i>        | 6.5E-6  | [2]  |
| 12     | rs10757272 | <i>CDKN2B-AS1</i> | 3.5E-4  | [1]  | 48     | rs1537370  | <i>CDKN2B-AS1</i>   | 2.3E-11 | [3]  |
| 13     | rs2834669  | <i>RUNX1</i>      | 3.9E-4  | [1]  | 49     | rs9349379  | <i>PHACTR1</i>      | 2.7E-11 | [4]  |
| 14     | rs10483853 | <i>NUMB</i>       | 6.1E-6  | [5]  | 50     | rs163189   | <i>PRDM6</i>        | 7.5E-3  | [4]  |
| 15     | rs10519394 | <i>PCDH18</i> *   | 1.1E-5  | [5]  | 51     | rs599839   | <i>PSRC1</i>        | 3.9E-3  | [4]  |
| 16     | rs9321354  | <i>TAAR5</i> *    | 3.4E-5  | [5]  | 52     | rs646776   | <i>CELSR2</i>       | 7.9E-12 | [4]  |
| 17     | rs220457   | <i>C17orf79</i> * | 3.8E-4  | [5]  | 53     | rs2259816  | <i>HNF1A</i>        | 4.8E-7  | [4]  |
| 18     | rs722208   | <i>ESR1</i>       | 5.0E-3  | [5]  | 54     | rs3184504  | <i>SH2B3</i>        | 8.6E-8  | [4]  |
| 19     | rs1365057  | <i>CD44</i> *     | 7.7E-3  | [5]  | 55     | rs9818870  | <i>MRAS</i>         | 7.4E-13 | [4]  |
| 20     | rs1467558  | <i>CD44</i>       | 2.0E-2  | [5]  | 56     | rs11206510 | <i>PCSK9</i>        | 9.6E-9  | [4]  |
| 21     | rs2190305  | <i>CREB5</i>      | 1.2E-6  | [6]  | 57     | rs12146493 | <i>DKFZp761E198</i> | 7.4E-3  | [4]  |
| 22     | rs9574536  | <i>SPRY2</i> *    | 2.4E-6  | [6]  |        |            |                     |         |      |
| 23     | rs7158225  | <i>FLRT2</i> *    | 5.3E-6  | [6]  |        |            |                     |         |      |
| 24     | rs17819063 | <i>FTO</i>        | 4.2E-5  | [6]  |        |            |                     |         |      |
| 25     | rs432695   | <i>CDYL</i> *     | 2.3E-7  | [6]  |        |            |                     |         |      |
| 26     | rs4867326  | <i>CDH6</i> *     | 4.7E-7  | [6]  |        |            |                     |         |      |
| 27     | rs622348   | <i>MIR759</i> *   | 3.8E-6  | [6]  |        |            |                     |         |      |
| 28     | rs16872734 | <i>GPR125</i>     | 7.0E-6  | [6]  |        |            |                     |         |      |
| 29     | rs2727551  | <i>PRKAG2</i>     | 5.2E-5  | [6]  |        |            |                     |         |      |
| 30     | rs10096362 | <i>CDH17</i> *    | 2.2E-6  | [6]  |        |            |                     |         |      |
| 31     | rs9843942  | <i>TGFBR2</i>     | 3.0E-6  | [6]  |        |            |                     |         |      |
| 32     | rs1679195  | <i>LPP</i>        | 3.4E-5  | [6]  |        |            |                     |         |      |
| 33     | rs2618157  | <i>THBS1</i> *    | 5.3E-5  | [6]  |        |            |                     |         |      |
| 34     | rs6032769  | <i>SLC35C2</i> *  | 1.3E-5  | [6]  |        |            |                     |         |      |
| 35     | rs1062087  | <i>TBC1D4</i>     | 4.2E-7  | [6]  |        |            |                     |         |      |
| 36     | rs3758014  | <i>ARHGEF10</i>   | 7.8E-5  | [6]  |        |            |                     |         |      |

Genotypes of these SNPs (previously associated with CAC) are used for predicting the binary CAC state among the ClinSeq® subjects. Nearest genes are listed for intergenic SNPs (marked with asterisk).

Table S5: List of highly predictive SNPs not previously associated with coronary calcium in past GWAS and meta-analyses (SNP Set 2)

| Number | SNP       | Locus                 | Number | SNP        | Locus                  |
|--------|-----------|-----------------------|--------|------------|------------------------|
| 1      | rs243170  | <i>FOXN3</i>          | 37     | rs8107904  | <i>EMR2*</i>           |
| 2      | rs243172  | <i>FOXN3</i>          | 38     | rs9290557  | <i>NAALADL2</i>        |
| 3      | rs328395  | <i>LOC100506172*</i>  | 39     | rs9804449  | <i>FGF3*</i>           |
| 4      | rs342393  | <i>NRG3</i>           | 40     | rs9967032  | <i>DOK6</i>            |
| 5      | rs480220  | <i>NRG3</i>           | 41     | rs10036954 | <i>C5orf34</i>         |
| 6      | rs514237  | <i>NRG3</i>           | 42     | rs10054519 | <i>C5orf28</i>         |
| 7      | rs571797  | <i>NRG3</i>           | 43     | rs10059993 | <i>NNT-AS1</i>         |
| 8      | rs750582  | <i>C5orf28*</i>       | 44     | rs10065689 | <i>NNT</i>             |
| 9      | rs1130329 | <i>RBAK-LOC389458</i> | 45     | rs10079672 | <i>AFAP1L1</i>         |
| 10     | rs1288331 | <i>SLC1A7*</i>        | 46     | rs10458221 | <i>EEF1E1-BLOC1S5*</i> |
| 11     | rs1366410 | <i>NNT</i>            | 47     | rs11131194 | <i>RPUSD3</i>          |
| 12     | rs1389401 | <i>ASB7*</i>          | 48     | rs11575624 | <i>HABP2</i>           |
| 13     | rs1505279 | <i>C15orf54*</i>      | 49     | rs11575634 | <i>HABP2</i>           |
| 14     | rs1887413 | <i>TTL*</i>           | 50     | rs11674863 | <i>LOC101927701</i>    |
| 15     | rs2217855 | <i>FBXO8*</i>         | 51     | rs11767632 | <i>YAE1D1*</i>         |
| 16     | rs2241097 | <i>TLR5</i>           | 52     | rs12521249 | <i>PAIP1*</i>          |
| 17     | rs2390285 | <i>MACC1</i>          | 53     | rs12645809 | <i>ANTXR2</i>          |
| 18     | rs4255867 | <i>DOK6</i>           | 54     | rs13159307 | <i>FBXL17*</i>         |
| 19     | rs4410460 | <i>KCNH8*</i>         | 55     | rs13220973 | <i>LOC401324*</i>      |
| 20     | rs4491835 | <i>SCN11A*</i>        | 56     | rs13429160 | <i>LOC101927701</i>    |
| 21     | rs4622486 | <i>C15orf54*</i>      |        |            |                        |
| 22     | rs4632970 | <i>AGK</i>            |        |            |                        |
| 23     | rs4676660 | <i>WDR48*</i>         |        |            |                        |
| 24     | rs4793853 | <i>MSI2</i>           |        |            |                        |
| 25     | rs6014727 | <i>CASS4</i>          |        |            |                        |
| 26     | rs6024879 | <i>CASS4</i>          |        |            |                        |
| 27     | rs6069753 | <i>CASS4</i>          |        |            |                        |
| 28     | rs6451696 | <i>C5orf28</i>        |        |            |                        |
| 29     | rs6565484 | <i>RPTOR</i>          |        |            |                        |
| 30     | rs6849832 | <i>DDIT4L*</i>        |        |            |                        |
| 31     | rs6860493 | <i>NNT</i>            |        |            |                        |
| 32     | rs7176702 | <i>MEGF11</i>         |        |            |                        |
| 33     | rs7225157 | <i>DNAH9</i>          |        |            |                        |
| 34     | rs7501899 | <i>C17orf54*</i>      |        |            |                        |
| 35     | rs7531219 | <i>PPP2R5A*</i>       |        |            |                        |
| 36     | rs7713479 | <i>NNT-AS1</i>        |        |            |                        |

Nearest genes are listed for intergenic SNPs (marked with asterisk \*).

Table S6: The network of genes derived by GeneMANIA from a database of 244 studies in humans. The loci of the 21 predictive SNPs are used as the input gene set for network construction. Gene symbols and names are based on the information from the HUGO Gene Nomenclature Committee (HGNC).

| Number | Gene symbol          | Gene name                                                                                              |
|--------|----------------------|--------------------------------------------------------------------------------------------------------|
| 1      | <i>MACC1</i>         | Metastasis Associated In Colon Cancer 1                                                                |
| 2      | <i>NRG3</i>          | Neuregulin 3                                                                                           |
| 3      | <i>ANTXR2</i>        | Anthrax Toxin Receptor 2                                                                               |
| 4      | <i>FBXL17</i>        | F-Box And Leucine-Rich Repeat Protein 17                                                               |
| 5      | <i>YAE1D1</i>        | Yae1 Domain Containing 1                                                                               |
| 6      | <i>PAIP1</i>         | Poly(A) Binding Protein Interacting Protein 1                                                          |
| 7      | <i>FOXN3</i>         | Forkhead Box N3                                                                                        |
| 8      | <i>C5orf28</i>       | Chromosome 5 Open Reading Frame 28                                                                     |
| 9      | <i>EMR2 (ADGRE2)</i> | EGF-like module-containing mucin-like hormone receptor-like 2 (Adhesion G Protein-Coupled Receptor E2) |
| 10     | <i>TLR5</i>          | Toll Like Receptor 5                                                                                   |
| 11     | <i>NNT</i>           | Nicotinamide Nucleotide Transhydrogenase                                                               |
| 12     | <i>WDR70</i>         | WD repeat domain 70                                                                                    |
| 13     | <i>FASTKD3</i>       | FAST Kinase Domains 3                                                                                  |
| 14     | <i>AIMP1</i>         | Aminoacyl TRNA Synthetase Complex-Interacting Multifunctional Protein 1                                |
| 15     | <i>EGLN1</i>         | Egl-9 Family Hypoxia Inducible Factor 1                                                                |
| 16     | <i>C5orf22</i>       | Chromosome 5 Open Reading Frame 22                                                                     |
| 17     | <i>MICU2</i>         | Mitochondrial Calcium Uptake 2                                                                         |
| 18     | <i>NIPBL</i>         | NIPBL, Cohesin Loading Factor                                                                          |
| 19     | <i>N6AMT1</i>        | N-6 adenine-specific DNA methyltransferase 1                                                           |
| 20     | <i>MARCH6</i>        | Membrane Associated Ring-CH-Type Finger 6                                                              |
| 21     | <i>ZNF131</i>        | Zinc Finger Protein 131                                                                                |
| 22     | <i>SRP72</i>         | Signal Recognition Particle 72kDa                                                                      |
| 23     | <i>ARID5B</i>        | AT-Rich Interaction Domain 5B                                                                          |
| 24     | <i>CEP72</i>         | Centrosomal Protein 72                                                                                 |
| 25     | <i>TIPRL</i>         | TOR Signaling Pathway Regulator                                                                        |
| 26     | <i>FAM172A</i>       | Family With Sequence Similarity 172 Member A                                                           |
| 27     | <i>EMC2</i>          | ER Membrane Protein Complex Subunit 2                                                                  |
| 28     | <i>EDEM1</i>         | ER Degradation Enhancing Alpha-Mannosidase Like Protein 1                                              |
| 29     | <i>CYB5R4</i>        | Cytochrome B5 Reductase 4                                                                              |
| 30     | <i>RETN</i>          | Resistin                                                                                               |
| 31     | <i>FUT3</i>          | Fucosyltransferase 3 (Lewis Blood Group)                                                               |

Network of genes derived from GeneMANIA based on 244 studies in humans.

Table S7: **Enriched diseases and biological functions in the gene network relevant to cardiovascular disease with p-values ranging between 1.0E-2 and 5.0E-2 (statistically less significant than the diseases and biological functions listed in Table 4) as identified by IPA based on Fisher's exact test.**

| Category                                                    | Disease or Function                        | Genes                             |
|-------------------------------------------------------------|--------------------------------------------|-----------------------------------|
| Cardiovascular System Development and Function              | Abnormal morphology of dilated vasculature | <i>ANTXR2</i>                     |
| Lipid Metabolism                                            | Recognition of lipid                       | <i>TLR5</i>                       |
| Connective Tissue Development and Function                  | Morphology of adipocytes                   | <i>ARID5B, RETN</i>               |
| Endocrine System Development and Function                   | Insulin sensitivity                        | <i>CYB5R4, RETN</i>               |
| Cell Signaling                                              | Handling of Ca <sup>2+</sup>               | <i>MICU2</i>                      |
| Organismal Injury and Abnormalities                         | Infection of kidney                        | <i>TLR5</i>                       |
| Metabolic Disease                                           | Susceptibility to type 2 diabetes mellitus | <i>RETN</i>                       |
| Hematological System Development and Function               | Decreased hematocrit of organism           | <i>EGLN1</i>                      |
| Respiratory System Development and Function                 | Respiratory minute volume                  | <i>EGLN1</i>                      |
| Cardiovascular System Development and Function              | Morphogenesis of heart                     | <i>EGLN1, NIPBL</i>               |
| Protein Synthesis                                           | Quantity of hemoglobin in blood            | <i>EGLN1</i>                      |
| Tissue Morphology                                           | Morphology of connective tissue            | <i>ARID5B, CYB5R4, RETN, TLR5</i> |
| Cellular Movement                                           | Migration of fibroblasts                   | <i>AIMP1, ARID5B</i>              |
| Cardiovascular System Development and Function              | Contractility of ventricular myocytes      | <i>TLR5</i>                       |
| Cellular Compromise, Hepatic System Disease                 | Oxidative stress response of hepatocytes   | <i>CYB5R4</i>                     |
| Cell-To-Cell Signaling and Interaction                      | Activation of kidney cell lines            | <i>TLR5</i>                       |
| Cellular Assembly and Organization, Inflammatory Response   | Formation of neutrophil extracellular trap | <i>RETN</i>                       |
| Cardiovascular System Development and Function              | Functional recovery of heart               | <i>EGLN1</i>                      |
| Free Radical Scavenging                                     | Metabolism of superoxide                   | <i>CYB5R4</i>                     |
| Endocrine System Development and Function                   | Quantity of insulin in blood               | <i>CYB5R4, TLR5</i>               |
| Cell Morphology, Cellular Function and Maintenance          | Autophagy of cytoplasm                     | <i>TLR5</i>                       |
| Carbohydrate Metabolism                                     | Synthesis of oligosaccharide               | <i>FUT3</i>                       |
| Cell Death and Survival                                     | Apoptosis of peripheral blood lymphocytes  | <i>AIMP1</i>                      |
| Metabolic Disease                                           | Hypoinsulinemia                            | <i>CYB5R4</i>                     |
| Cell-To-Cell Signaling and Interaction                      | Activation of smooth muscle cells          | <i>RETN</i>                       |
| Cardiovascular Disease, Organismal Injury and Abnormalities | Dysfunction of endothelial tissue          | <i>RETN</i>                       |
| Metabolic Disease                                           | Insulin-dependent diabetes mellitus        | <i>NRG3, RETN, TLR5</i>           |
| Endocrine System Disorders, Metabolic Disease               | Insulin resistance of liver                | <i>RETN</i>                       |
| Protein Synthesis                                           | Quantity of protein in blood               | <i>CYB5R4, EGLN1, TLR5</i>        |
| Cardiovascular System Development and Function              | Morphogenesis of ventricular septum        | <i>EGLN1</i>                      |
| Cell Morphology, Cellular Assembly and Organization         | Size of mitochondria                       | <i>CYB5R4</i>                     |
| Connective Tissue Development and Function                  | Mass of adipose tissue                     | <i>CYB5R4, TLR5</i>               |
| Connective Tissue Development and Function                  | Differentiation of fibroblast cell lines   | <i>EGLN1, RETN</i>                |
| Molecular Transport, Nucleic Acid Metabolism                | Quantity of NADPH                          | <i>NNT</i>                        |
| Cellular Assembly and Organization                          | Activation of mitochondria                 | <i>RETN</i>                       |
| Immune Cell Trafficking, Inflammatory Response              | Cellular infiltration by monocytes         | <i>RETN</i>                       |
| Cellular Compromise                                         | Stress response of cells                   | <i>CYB5R4, RETN</i>               |
| Connective Tissue Development and Function                  | Abnormal morphology of adipocytes          | <i>ARID5B</i>                     |
| Cardiovascular System Development and Function              | Density of capillary vessel                | <i>EGLN1</i>                      |
| Carbohydrate Metabolism                                     | Disposal of D-glucose                      | <i>RETN</i>                       |

*Continued on next page*

Table S7 – *Continued from previous page*

| Category                                       | Disease or Function                     | Genes                     |
|------------------------------------------------|-----------------------------------------|---------------------------|
| Hematological System Development and Function  | Hematocrit of blood                     | <i>EGLN1</i>              |
| Immune Cell Trafficking, Inflammatory Response | Cellular infiltration by macrophages    | <i>EGLN1, RETN</i>        |
| Cardiovascular System Development and Function | Abnormal morphology of trabeculae carne | <i>EGLN1</i>              |
| Nutritional Disease                            | Obesity                                 | <i>ARID5B, RETN, TLR5</i> |
| Hematological System Development and Function  | Cell viability of neutrophils           | <i>ADGRE2</i>             |
| Cell-mediated Immune Response                  | Development of Th17 cells               | <i>TLR5</i>               |
| Hematological Disease, Immunological Disease   | Growth of lymphoma                      | <i>AIMP1</i>              |
| Cardiovascular System Development and Function | Morphogenesis of cardiac muscle         | <i>EGLN1</i>              |
| Connective Tissue Development and Function     | Function of adipose tissue              | <i>TLR5</i>               |
| Protein Synthesis                              | Production of cytokine                  | <i>TLR5</i>               |
| Cardiovascular System Development and Function | QT interval of heart                    | <i>NRG3</i>               |



Table S8: Interactions within the advanced coronary calcium network generated by GeneMANIA (network shown in Figure 6). The nature of interactions (INT) between gene pairs are based either on co-expression (CE) or genetic interactions (GI). We list the source of the interactions (networks previously published) under “Ref”.

| #  | Gene 1  | Gene 2  | INT | Ref | #  | Gene 1  | Gene 2  | INT | Ref  | #   | Gene 1  | Gene 2  | INT | Ref  |
|----|---------|---------|-----|-----|----|---------|---------|-----|------|-----|---------|---------|-----|------|
| 1  | C5orf28 | PAIP1   | CE  | [7] | 48 | C5orf22 | C5orf28 | CE  | [8]  | 95  | AIMP1   | NNT     | CE  | [9]  |
| 2  | WDR70   | PAIP1   | CE  | [7] | 49 | C5orf22 | NNT     | CE  | [8]  | 96  | C5orf22 | PAIP1   | CE  | [9]  |
| 3  | WDR70   | C5orf28 | CE  | [7] | 50 | C5orf22 | WDR70   | CE  | [8]  | 97  | MARCH6  | NNT     | CE  | [9]  |
| 4  | FASTKD3 | PAIP1   | CE  | [7] | 51 | C5orf22 | FASTKD3 | CE  | [8]  | 98  | ZNF131  | NNT     | CE  | [9]  |
| 5  | FASTKD3 | C5orf28 | CE  | [7] | 52 | MICU2   | PAIP1   | CE  | [8]  | 99  | SRP72   | MICU2   | CE  | [9]  |
| 6  | FASTKD3 | WDR70   | CE  | [7] | 53 | MICU2   | C5orf28 | CE  | [8]  | 100 | TIPRL   | TLR5    | CE  | [9]  |
| 7  | AIMP1   | C5orf28 | CE  | [7] | 54 | MICU2   | AIMP1   | CE  | [8]  | 101 | EMC2    | AIMP1   | CE  | [9]  |
| 8  | EGLN1   | FOXN3   | CE  | [7] | 55 | NIPBL   | C5orf28 | CE  | [8]  | 102 | C5orf28 | PAIP1   | CE  | [10] |
| 9  | C5orf22 | NNT     | CE  | [7] | 56 | NIPBL   | C5orf22 | CE  | [8]  | 103 | C5orf22 | NNT     | CE  | [10] |
| 10 | MICU2   | PAIP1   | CE  | [7] | 57 | N6AMT1  | C5orf28 | CE  | [8]  | 104 | C5orf22 | FASTKD3 | CE  | [10] |
| 11 | NIPBL   | NNT     | CE  | [7] | 58 | N6AMT1  | FASTKD3 | CE  | [8]  | 105 | MICU2   | FBXL17  | CE  | [10] |
| 12 | NIPBL   | C5orf22 | CE  | [7] | 59 | MARCH6  | C5orf22 | CE  | [8]  | 106 | MICU2   | PAIP1   | CE  | [10] |
| 13 | N6AMT1  | C5orf28 | CE  | [7] | 60 | MARCH6  | NIPBL   | CE  | [8]  | 107 | ZNF131  | C5orf28 | CE  | [10] |
| 14 | MARCH6  | C5orf28 | CE  | [7] | 61 | ZNF131  | WDR70   | CE  | [8]  | 108 | EDEM1   | ARID5B  | CE  | [10] |
| 15 | MARCH6  | FASTKD3 | CE  | [7] | 62 | ZNF131  | FASTKD3 | CE  | [8]  | 109 | FBXL17  | ANTXR2  | GI  | [11] |
| 16 | MARCH6  | C5orf22 | CE  | [7] | 63 | ZNF131  | C5orf22 | CE  | [8]  | 110 | YAE1D1  | ANTXR2  | GI  | [11] |
| 17 | MARCH6  | NIPBL   | CE  | [7] | 64 | ARID5B  | FOXN3   | CE  | [8]  | 111 | PAIP1   | YAE1D1  | GI  | [11] |
| 18 | ZNF131  | PAIP1   | CE  | [7] | 65 | CEP72   | FASTKD3 | CE  | [8]  | 112 | FOXN3   | FBXL17  | GI  | [11] |
| 19 | ZNF131  | WDR70   | CE  | [7] | 66 | FAM172A | C5orf28 | CE  | [8]  | 113 | NNT     | ANTXR2  | GI  | [11] |
| 20 | ZNF131  | FASTKD3 | CE  | [7] | 67 | FAM172A | MARCH6  | CE  | [8]  | 114 | NNT     | FOXN3   | GI  | [11] |
| 21 | ZNF131  | C5orf22 | CE  | [7] | 68 | EMC2    | PAIP1   | CE  | [8]  | 115 | WDR70   | EMR2    | GI  | [11] |
| 22 | ZNF131  | MICU2   | CE  | [7] | 69 | EDEM1   | NNT     | CE  | [8]  | 116 | AIMP1   | MACC1   | GI  | [11] |
| 23 | ZNF131  | NIPBL   | CE  | [7] | 70 | C5orf28 | YAE1D1  | CE  | [12] | 117 | AIMP1   | YAE1D1  | GI  | [11] |
| 24 | ZNF131  | MARCH6  | CE  | [7] | 71 | FASTKD3 | YAE1D1  | CE  | [12] | 118 | AIMP1   | PAIP1   | GI  | [11] |
| 25 | SRP72   | C5orf28 | CE  | [7] | 72 | AIMP1   | YAE1D1  | CE  | [12] | 119 | EGLN1   | FOXN3   | GI  | [11] |
| 26 | SRP72   | AIMP1   | CE  | [7] | 73 | AIMP1   | C5orf28 | CE  | [12] | 120 | C5orf22 | FOXN3   | GI  | [11] |
| 27 | ARID5B  | FOXN3   | CE  | [7] | 74 | MICU2   | WDR70   | CE  | [12] | 121 | MICU2   | ANTXR2  | GI  | [11] |
| 28 | CEP72   | PAIP1   | CE  | [7] | 75 | TIPRL   | SRP72   | CE  | [12] | 122 | MICU2   | FOXN3   | GI  | [11] |
| 29 | CEP72   | C5orf28 | CE  | [7] | 76 | FAM172A | WDR70   | CE  | [12] | 123 | NIPBL   | ANTXR2  | GI  | [11] |
| 30 | TIPRL   | C5orf28 | CE  | [7] | 77 | EMC2    | YAE1D1  | CE  | [12] | 124 | NIPBL   | EMR2    | GI  | [11] |
| 31 | TIPRL   | FASTKD3 | CE  | [7] | 78 | EMC2    | C5orf28 | CE  | [12] | 125 | N6AMT1  | FBXL17  | GI  | [11] |
| 32 | TIPRL   | ZNF131  | CE  | [7] | 79 | EMC2    | FASTKD3 | CE  | [12] | 126 | N6AMT1  | FOXN3   | GI  | [11] |
| 33 | FAM172A | FOXN3   | CE  | [7] | 80 | CYB5R4  | MICU2   | CE  | [12] | 127 | MARCH6  | FBXL17  | GI  | [11] |
| 34 | EMC2    | C5orf28 | CE  | [7] | 81 | RETN    | EMR2    | CE  | [12] | 128 | MARCH6  | YAE1D1  | GI  | [11] |
| 35 | EMC2    | AIMP1   | CE  | [7] | 82 | FUT3    | MACC1   | CE  | [12] | 129 | SRP72   | PAIP1   | GI  | [11] |
| 36 | EMC2    | SRP72   | CE  | [7] | 83 | NNT     | PAIP1   | CE  | [13] | 130 | SRP72   | FOXN3   | GI  | [11] |
| 37 | EDEM1   | EMR2    | CE  | [7] | 84 | NIPBL   | FOXN3   | CE  | [13] | 131 | SRP72   | NIPBL   | GI  | [11] |
| 38 | CYB5R4  | PAIP1   | CE  | [7] | 85 | NIPBL   | NNT     | CE  | [13] | 132 | FAM172A | MICU2   | GI  | [11] |
| 39 | RETN    | TLR5    | CE  | [7] | 86 | MARCH6  | PAIP1   | CE  | [13] | 133 | EMC2    | YAE1D1  | GI  | [11] |
| 40 | FUT3    | TLR5    | CE  | [7] | 87 | MARCH6  | NIPBL   | CE  | [13] | 134 | EMC2    | AIMP1   | GI  | [11] |
| 41 | C5orf28 | PAIP1   | CE  | [8] | 88 | SRP72   | FOXN3   | CE  | [13] | 135 | EDEM1   | FBXL17  | GI  | [11] |
| 42 | WDR70   | C5orf28 | CE  | [8] | 89 | TIPRL   | NNT     | CE  | [13] | 136 | EDEM1   | C5orf28 | GI  | [11] |
| 43 | WDR70   | NNT     | CE  | [8] | 90 | FAM172A | NNT     | CE  | [13] | 137 | EDEM1   | MARCH6  | GI  | [11] |
| 44 | FASTKD3 | PAIP1   | CE  | [8] | 91 | FAM172A | NIPBL   | CE  | [13] | 138 | CYB5R4  | FBXL17  | GI  | [11] |
| 45 | FASTKD3 | C5orf28 | CE  | [8] | 92 | FAM172A | MARCH6  | CE  | [13] | 139 | CYB5R4  | FOXN3   | GI  | [11] |
| 46 | EGLN1   | NNT     | CE  | [8] | 93 | NNT     | PAIP1   | CE  | [9]  | 140 | CYB5R4  | NNT     | GI  | [11] |
| 47 | C5orf22 | PAIP1   | CE  | [8] | 94 | AIMP1   | PAIP1   | CE  | [9]  | 141 | RETN    | C5orf28 | GI  | [11] |
|    |         |         |     |     |    |         |         |     |      | 142 | FUT3    | AIMP1   | GI  | [11] |

## References

1. Ferguson, J.F., Matthews, G.J., Townsend, R.R., Raj, D.S., Kanetsky, P.A., Budoff, M., Fischer, M.J., Rosas, S.E., Kanthety, R., Rahman, M., *et al.*: Candidate gene association study of coronary artery calcification in chronic kidney disease: findings from the CRIC study (Chronic Renal Insufficiency Cohort). *Journal of the American College of Cardiology* **62**(9), 789–798 (2013)
2. Wojczynski, M.K., Li, M., Bielak, L.F., Kerr, K.F., Reiner, A.P., Wong, N.D., Yanek, L.R., Qu, L., White, C.C., Lange, L.A., *et al.*: Genetics of coronary artery calcification among African Americans, a meta-analysis. *BMC medical genetics* **14**(1), 75 (2013)
3. van Setten, J., Isgum, I., Smolonska, J., Ripke, S., de Jong, P.A., Oudkerk, M., de Koning, H., Lammers, J.-W.J., Zanen, P., Groen, H.J., *et al.*: Genome-wide association study of coronary and aortic calcification implicates risk loci for coronary artery disease and myocardial infarction. *Atherosclerosis* **228**(2), 400–405 (2013)
4. O'Donnell, C.J., Kavousi, M., Smith, A.V., Kardia, S.L., Feitosa, M.F., Hwang, S.-J., Sun, Y.V., Province, M.A., Aspelund, T., Dehghan, A., *et al.*: Genome-wide association study for coronary artery calcification with follow-up in myocardial infarction. *Circulation* **124**(25), 2855–2864 (2011)
5. O'Donnell, C.J., Cupples, L.A., D'Agostino, R.B., Fox, C.S., Hoffmann, U., Hwang, S.-J., Ingellson, E., Liu, C., Murabito, J.M., Polak, J.F., *et al.*: Genome-wide association study for subclinical atherosclerosis in major arterial territories in the NHLBI's Framingham Heart Study. *BMC medical genetics* **8**(Suppl 1), 4 (2007)
6. Polfus, L.M., Smith, J.A., Shimmin, L.C., Bielak, L.F., Morrison, A.C., Kardia, S.L., Peyser, P.A., Hixson, J.E.: Genome-wide association study of gene by smoking interactions in coronary artery calcification. *PloS one* **8**(10), 74642 (2013)
7. Gysin, S., Paquette, J., McMahon, M.: Analysis of mrna profiles after mek1/2 inhibition in human pancreatic cancer cell lines reveals pathways involved in drug sensitivity. *Molecular Cancer Research* **10**(12), 1607–1619 (2012)
8. Salaverria, I., Philipp, C., Oshlies, I., Kohler, C.W., Kreuz, M., Szczepanowski, M., Burkhardt, B., Trautmann, H., Gesk, S., Andrusiewicz, M., *et al.*: Translocations activating irf4 identify a subtype

- of germinal center-derived b-cell lymphoma affecting predominantly children and young adults. *Blood* **118**(1), 139–147 (2011)
9. Bild, A.H., Yao, G., Chang, J.T., Wang, Q., Potti, A., Chasse, D., Joshi, M.-B., Harpole, D., Lancaster, J.M., Berchuck, A., *et al.*: Oncogenic pathway signatures in human cancers as a guide to targeted therapies. *Nature* **439**(7074), 353–357 (2006)
  10. Bahr, T.M., Hughes, G.J., Armstrong, M., Reisdorph, R., Coldren, C.D., Edwards, M.G., Schnell, C., Kedl, R., LaFlamme, D.J., Reisdorph, N., *et al.*: Peripheral blood mononuclear cell gene expression in chronic obstructive pulmonary disease. *American journal of respiratory cell and molecular biology* **49**(2), 316–323 (2013)
  11. Lin, A., Wang, R.T., Ahn, S., Park, C.C., Smith, D.J.: A genome-wide map of human genetic interactions inferred from radiation hybrid genotypes. *Genome research* **20**(8), 1122–1132 (2010)
  12. Innocenti, F., Cooper, G.M., Stanaway, I.B., Gamazon, E.R., Smith, J.D., Mirkov, S., Ramirez, J., Liu, W., Lin, Y.S., Moloney, C., *et al.*: Identification, replication, and functional fine-mapping of expression quantitative trait loci in primary human liver tissue. *PLoS Genet* **7**(5), 1002078 (2011)
  13. Wang, Q., Diskin, S., Rappaport, E., Attiyeh, E., Mosse, Y., Shue, D., Seiser, E., Jagannathan, J., Shusterman, S., Bansal, M., *et al.*: Integrative genomics identifies distinct molecular classes of neuroblastoma and shows that multiple genes are targeted by regional alterations in dna copy number. *Cancer research* **66**(12), 6050–6062 (2006)
